# Supplementary material for: On the use OF 1H-NMR chemical shifts and thermodynamic data for the prediction of the predominant conformation of organic molecules in solution: the example of the flavonoid rutin
Source: Royal Society of Chemistry journal article supplement (doi:10.1039/d4ra03430a), 2024-01-01
Supplement: d4ra03430a1.pdf [file d4ra03430a1.pdf]

## SUPPLEMENTARY MATERIAL

### ON THE USE OF $^1\text{H}$ NMR CHEMICAL SHIFTS AND THERMODYNAMIC DATA FOR THE PREDICTION OF THE PREDOMINANT CONFORMATION OF ORGANIC MOLECULES IN SOLUTION: The example of the flavonoid Rutin

Haroldo C. Da Silva<sup>a,b</sup>, Wagner B. De Almeida<sup>a,\*</sup>

<sup>a</sup> Laboratório de Química Computacional e Modelagem Molecular (LQC-MM), Departamento de Química Inorgânica, Instituto de Química, Universidade Federal Fluminense (UFF), Outeiro de São João Batista s/n, Campus do Valonguinho, 24020-141, Centro, Niterói, RJ, Brazil.

<sup>b</sup> Laboratório de Química Teórica e Simulação Molecular (LQTSM), Departamento de Físico-Química, Instituto de Química, Pavilhão Haroldo Lisboa da Cunha, Universidade do Estado do Rio de Janeiro (UERJ), Rua São Francisco Xavier, 524, 20550-013, Maracanã, Rio de Janeiro, RJ, Brazil.

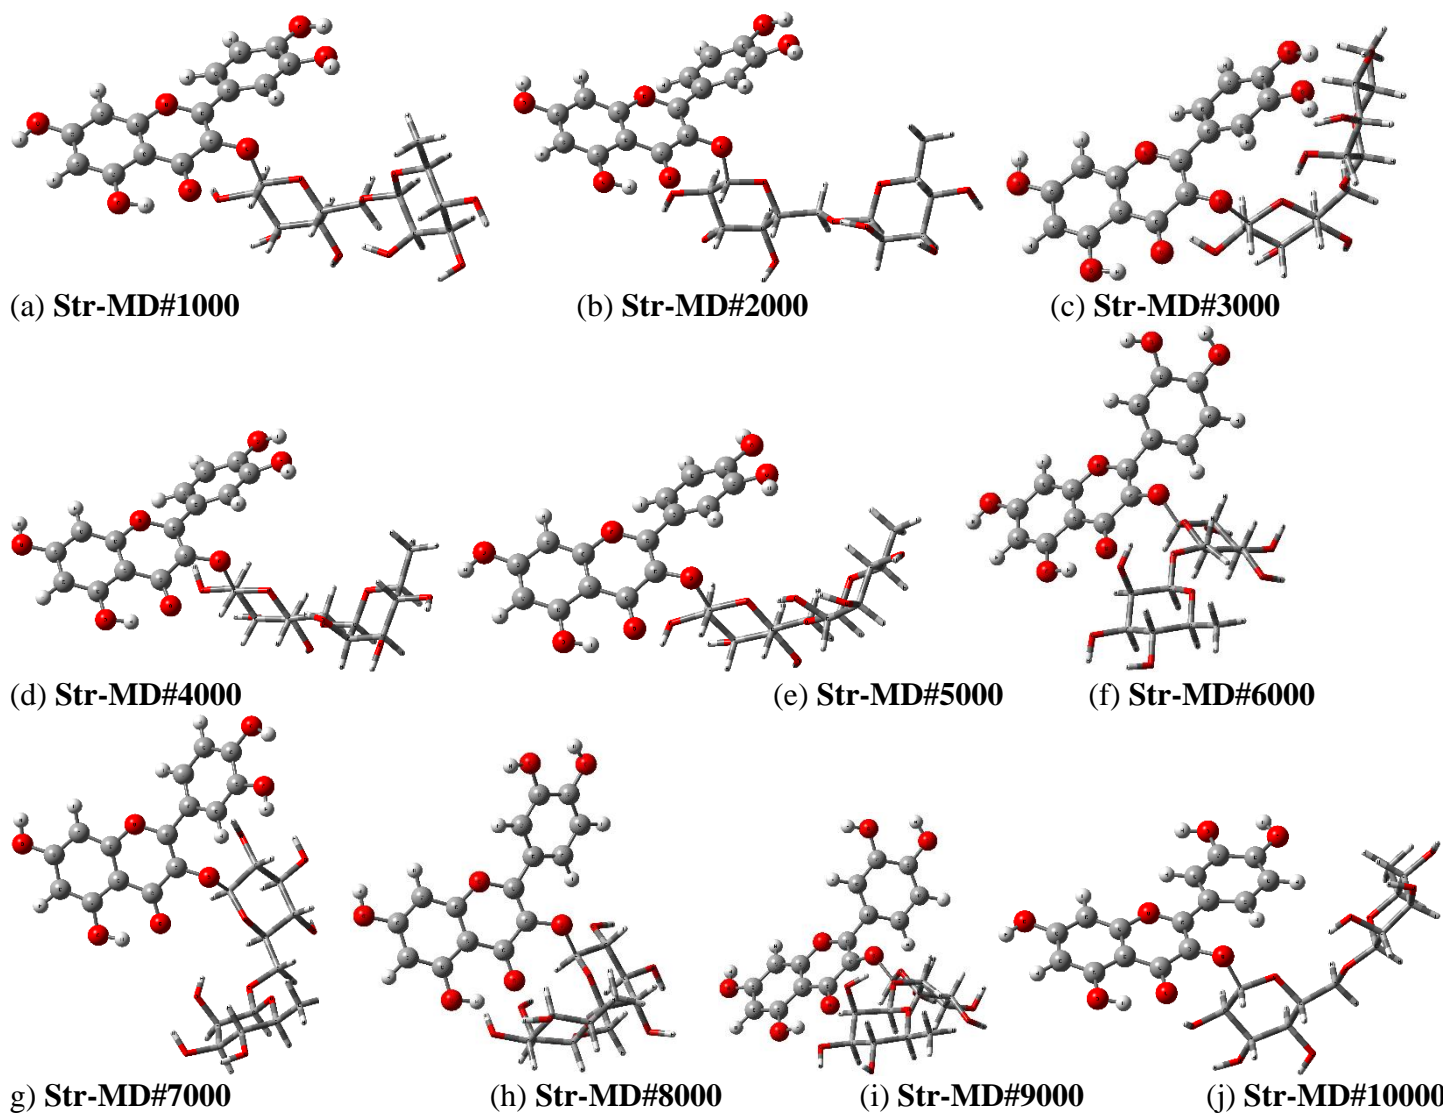

**Figure S1.**  $\omega$ B97x-D /6-31G(d,p) new fully optimized structures of rutin obtained from ten frames (from a total of 10000) of MD simulation in DMSO. The optimized torsion angle values are given in Table S1.

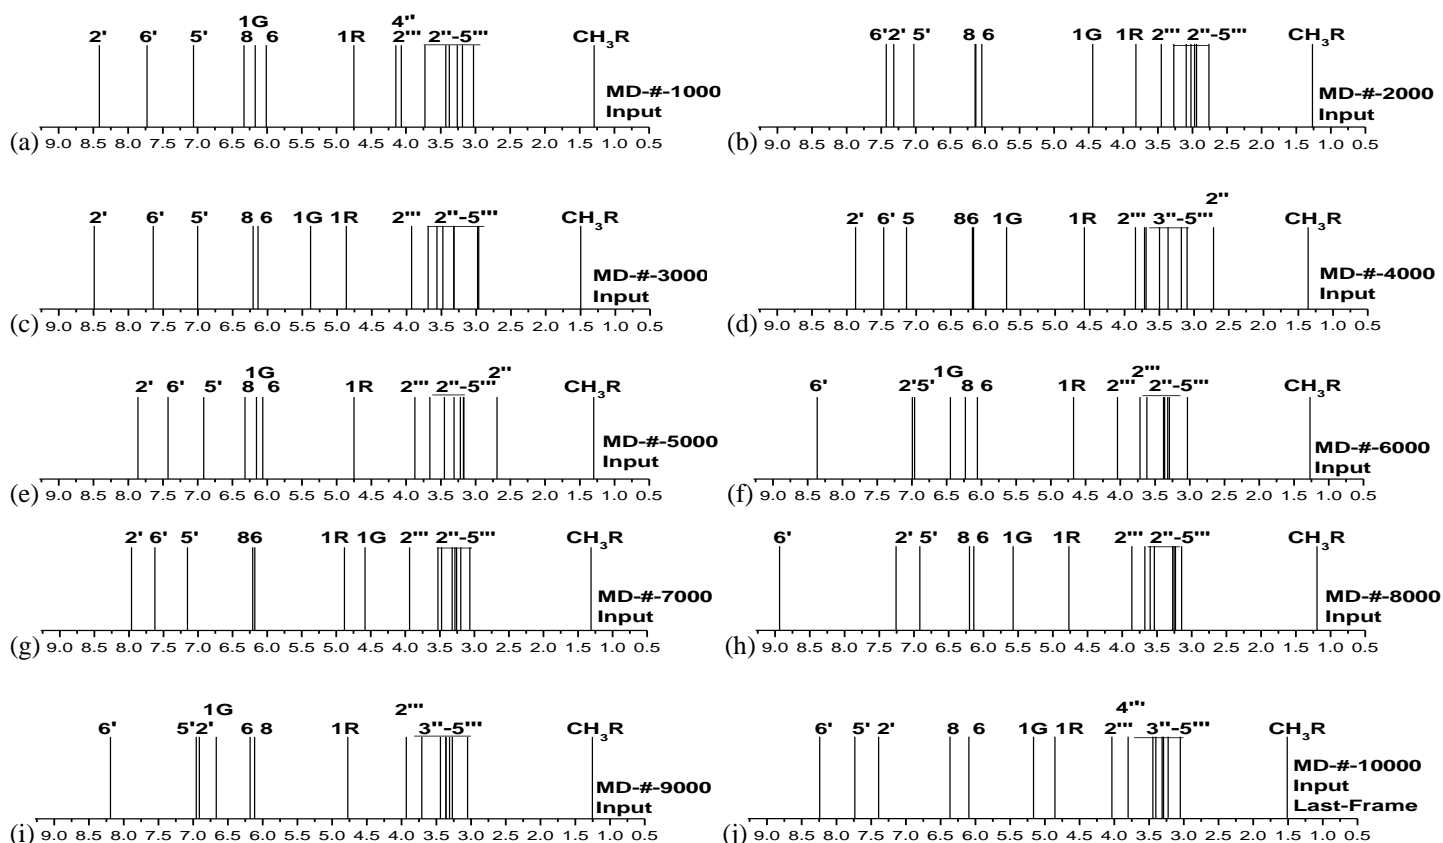

**Figure S2.** B3LYP/6-31G(d,p)-PCM-DMSO  $^1\text{H}$  NMR spectra for DFT optimized rutin structures (MD inputs)

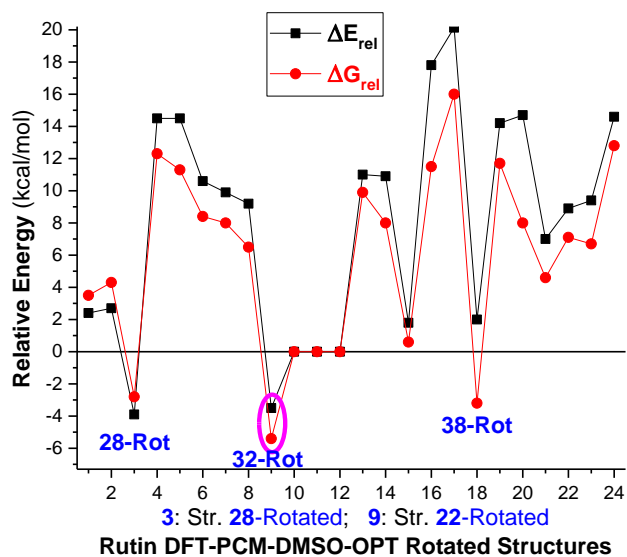

**Figure S3.**  $\omega$ B97x-D/6-31G(d,p)-PCM-DMSO relative energies ( $\Delta E_{\text{rel}}$  and  $\Delta G_{\text{rel}}$  in kcal mol<sup>-1</sup>) for relevant fully optimized and  $\phi_1$ ,  $\phi_s$  rotated structures located on the PES for rutin.  $\Delta G_{\text{rel}}$  was estimated using thermal corrections for DFT fully optimized structures (the  $\phi_1$ ,  $\phi_s$  rotated structures are not true minimum on the PES, so harmonic frequency calculations, needed for evaluation of thermal correction, are meaningless).

**1:** Str-28-PCM-OPT; **2:** Str-28 Vacuum-OPT; **3: Str-28-PCM-OPT-Rotated;** **4:** Str-30-PCM-OPT; **5:** Str-30 Vacuum-OPT; **6: Str-30-PCM-OPT-Rotated;** **7:** Str-32-PCM-OPT; **8:** Str-32 Vacuum-OPT; **9: Str-32-PCM-OPT-Rotated;** **10:** Str-34-PCM-OPT; **11:** Str-34 Vacuum-OPT; **12: Str-34-PCM-OPT-Rotated;** **13:** Str-37-PCM-OPT; **14:** Str-37 Vacuum-OPT; **15: Str-37-PCM-OPT-Rotated;** **16:** Str-38-PCM-OPT; **17:** Str-38 Vacuum-OPT; **18: Str-38-PCM-OPT-Rotated;** **19:** Str-42-PCM-OPT; **20:** Str-42 Vacuum-OPT; **21: Str-42-PCM-OPT-Rotated;** **22:** Str-44-PCM-OPT; **23:** Str-44 Vacuum-OPT; **24: Str-44-PCM-OPT-Rotated.**

**Table S1.** Deviation between  $\omega$ B97x-D/6-31G(d,p)-PCM-DMSO and B3LYP/6-31G(d,p)-PCM-DMSO  $^1\text{H}$  NMR chemical shifts (in ppm) for rotated structures of rutin. MAE (in ppm) values are also given.

| CH <sub>n</sub> Protons | Str.-28-Rot | Str.-30-Rot | Str.-32-Rot | Str.-34-Rot | Str.-37-Rot | Str.-42-Rot | Str.-44-Rot |
|-------------------------|-------------|-------------|-------------|-------------|-------------|-------------|-------------|
| H-C6                    | 0.19        | 0.19        | 0.17        | 0.24        | 0.29        | 0.16        | 0.25        |
| H-C8                    | 0.18        | 0.22        | 0.2         | 0.18        | 0.13        | 0.16        | 0.19        |
| H-C2'                   | 0.15        | 0.18        | 0.20        | 0.16        | 0.08        | 0.24        | 0.14        |
| H-C5'                   | 0.22        | 0.21        | 0.22        | 0.20        | 0.21        | 0.16        | 0.16        |
| H-C6'                   | 0.15        | 0.18        | 0.25        | 0.21        | 0.19        | 0.13        | 0.18        |
| H-C1-R                  | -0.23       | -0.12       | -0.11       | -0.10       | -0.07       | -0.05       | -0.09       |
| H-C1-G                  | -0.21       | -0.05       | -0.14       | -0.09       | -0.09       | -0.14       | -0.07       |
| H-CH3                   | -0.05       | 0.003       | -0.006      | 0.03        | 0.02        | 0.04        | 0.03        |
| H-2''                   | -0.01       | -0.11       | 0.05        | -0.03       | -0.24       | -0.07       | -0.09       |
| H-3''                   | -0.03       | -0.01       | -0.01       | 0.013       | 0.01        | -0.002      | 0.03        |
| H-4''                   | 0.004       | -0.10       | -0.01       | -0.13       | -0.14       | -0.02       | -0.10       |
| H-5''                   | -0.13       | -0.11       | -0.12       | -0.04       | -0.06       | -0.04       | -0.06       |
| H-2'''                  | -0.04       | -0.07       | -0.02       | -0.07       | -0.03       | -0.04       | -0.05       |
| H-3'''                  | -0.21       | 0.04        | 0.03        | 0.07        | 0.14        | 0.12        | 0.09        |
| H-4'''                  | 0.01        | -0.02       | -0.04       | -0.05       | -0.14       | -0.12       | -0.11       |
| H-5'''                  | -0.30       | -0.05       | -0.06       | 0.04        | 0.03        | 0.01        | -0.001      |
| <b>MAE</b>              | <b>0.13</b> | <b>0.10</b> | <b>0.10</b> | <b>0.10</b> | <b>0.12</b> | <b>0.09</b> | <b>0.10</b> |

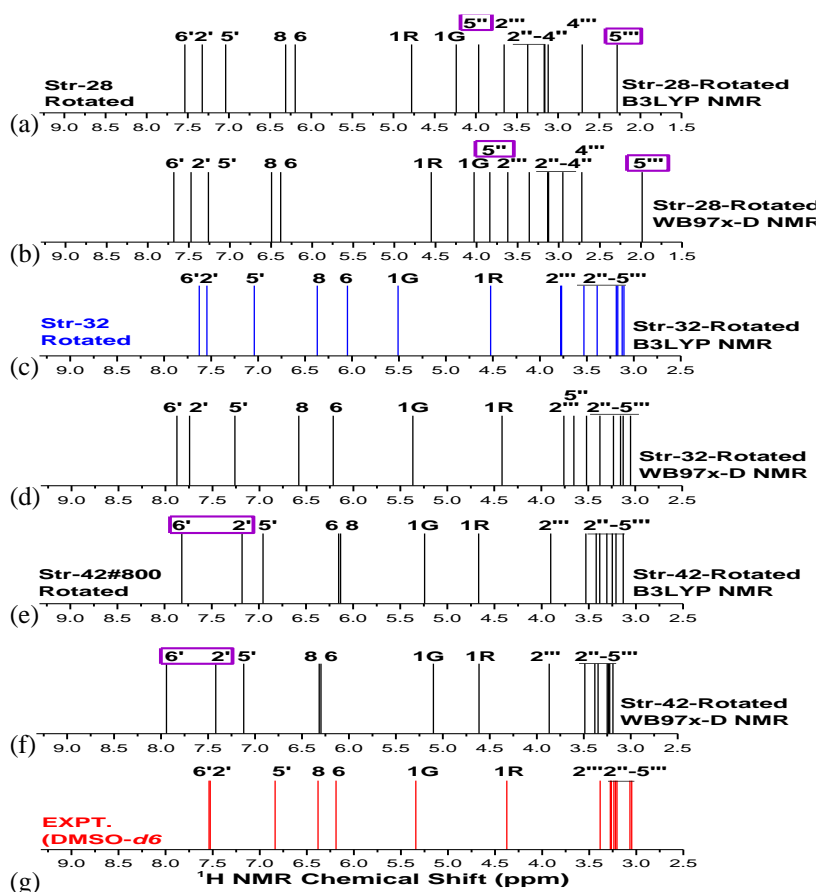

**Figure S4.** B3LYP/6-31G(d,p)-PCM-DMSO and  $\omega$ B97x-D /6-31G(d,p)-PCM-DMSO  $^1\text{H}$  NMR spectra for selected structures of rutin ( $\omega$ B97x-D /6-31G(d,p)-PCM-DMSO optimized geometries) (a-f) and experimental spectra (in DMSO-*d*6) (g). The protons having large deviation from experimental data are highlighted in pink rectangle.

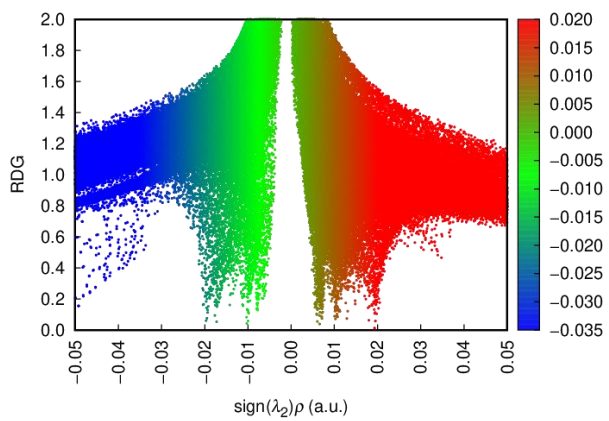

(a) 28 full opt

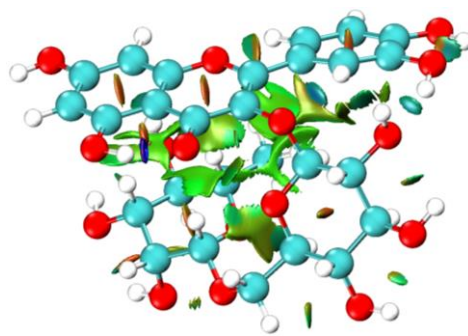

(b) 28 full opt

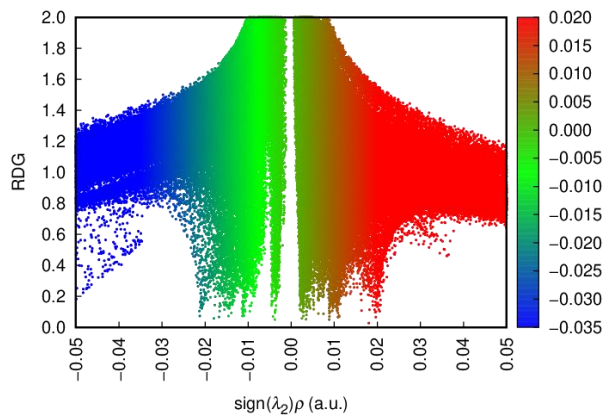

(c) 28 rot

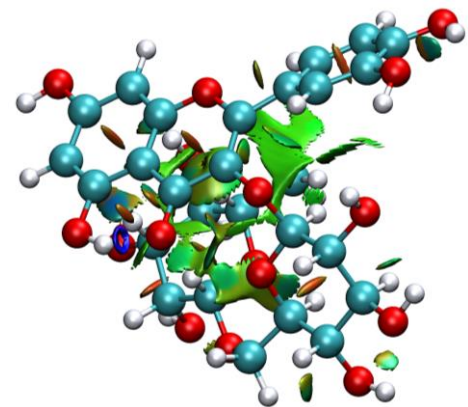

(d) 28 rot

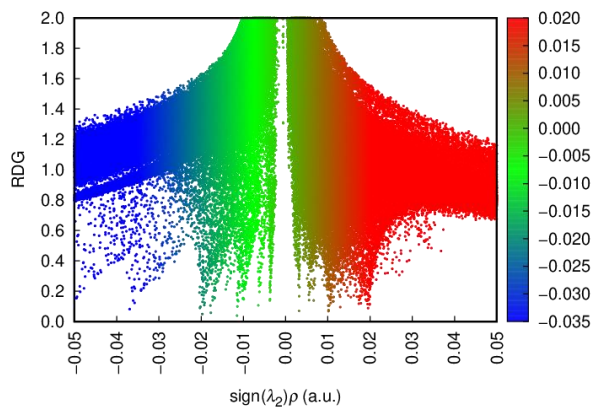

**(e) 30 FO**

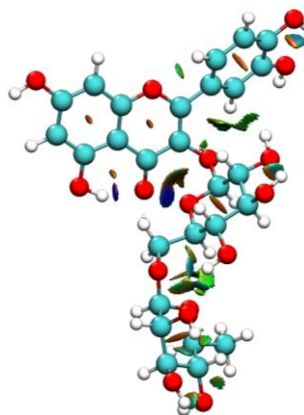

**(f) 30 FO**

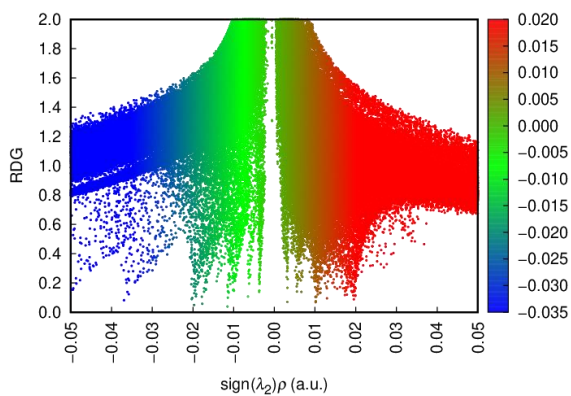

**(g) 30 ROT**

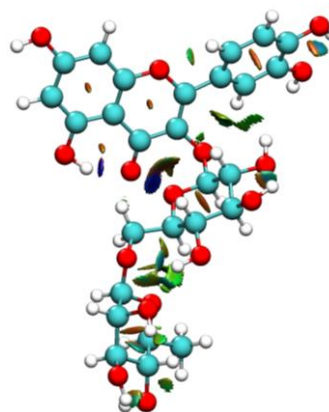

**(h) 30 ROT**

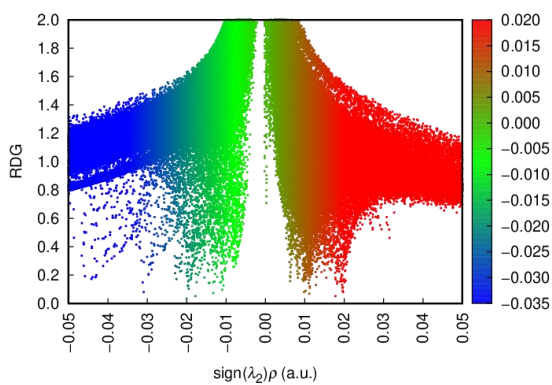

**(i) 32FO**

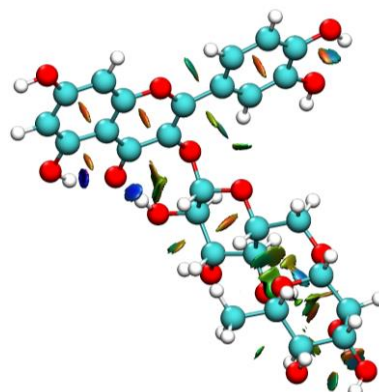

**(j) 32FO**

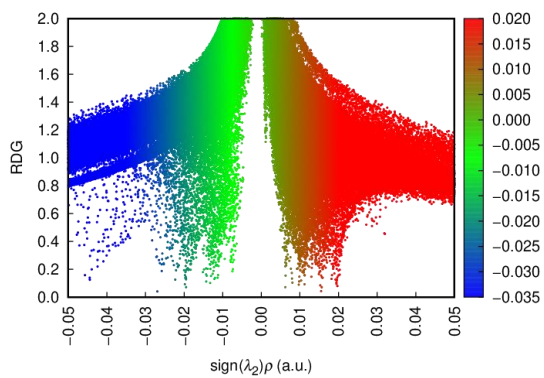

**(k) 32ROT**

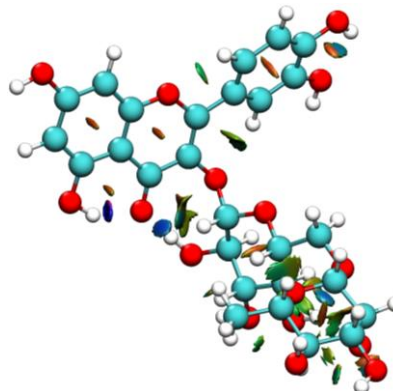

**(l) 32 ROT**



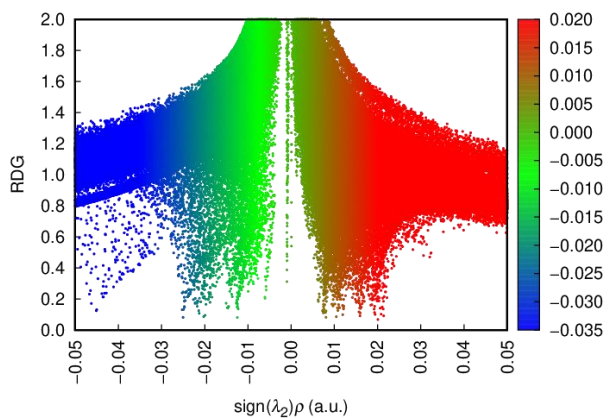

**(m) 34 FO**

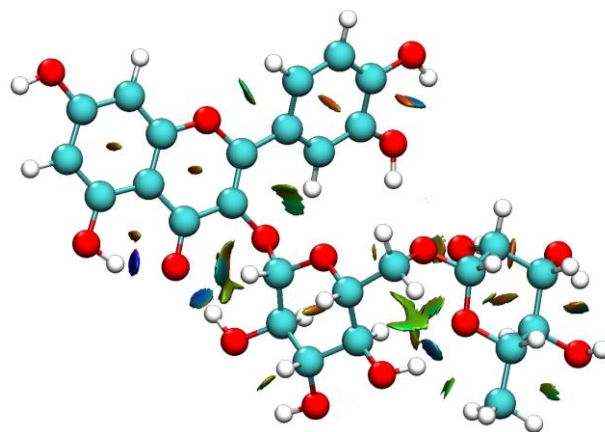

**(n) 34 FO**

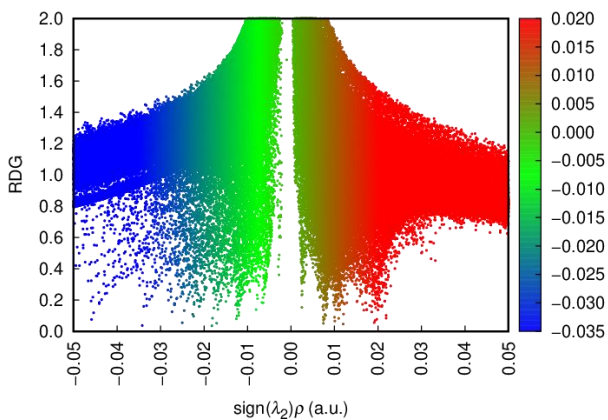

**(o) 34 ROT**

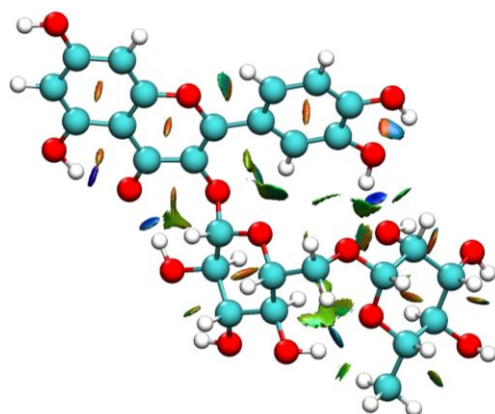

**(p) 34 ROT**

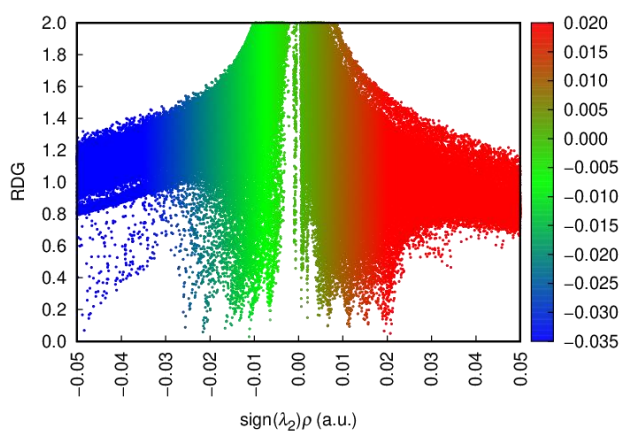

**(q) 37 FO**

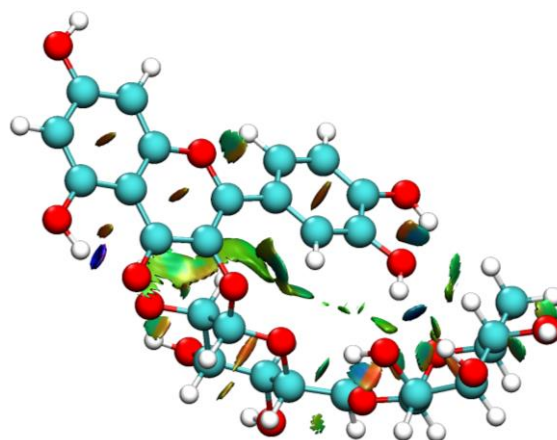

**(r) 37 FO**

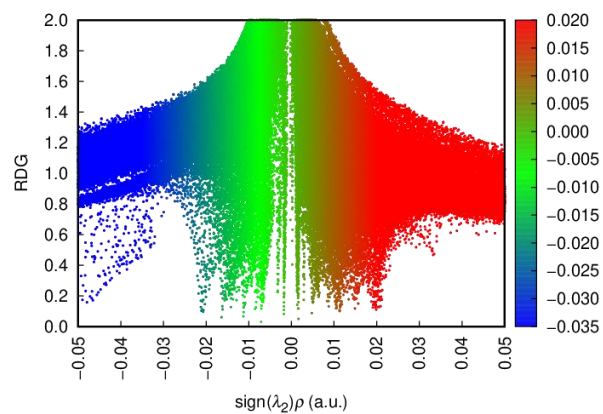

**(s) 37 ROT**

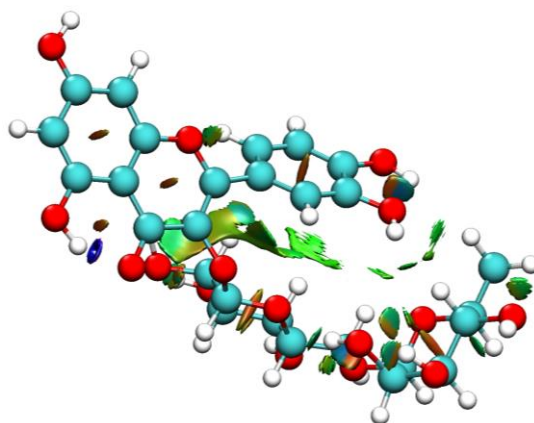

**(t) 37 ROT**

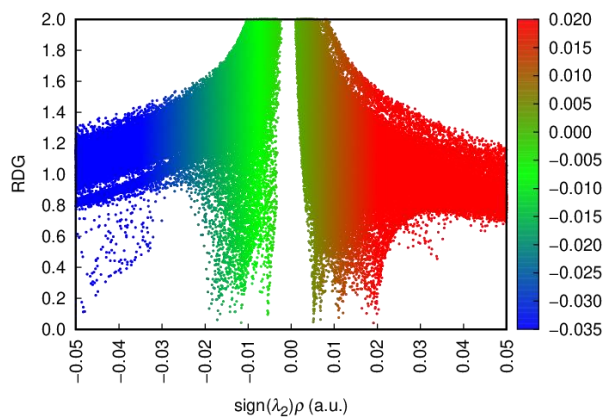

**(u) 38 FO**

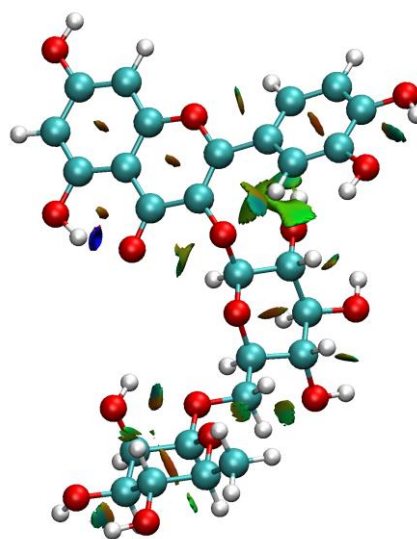

**(v) 38 FO**

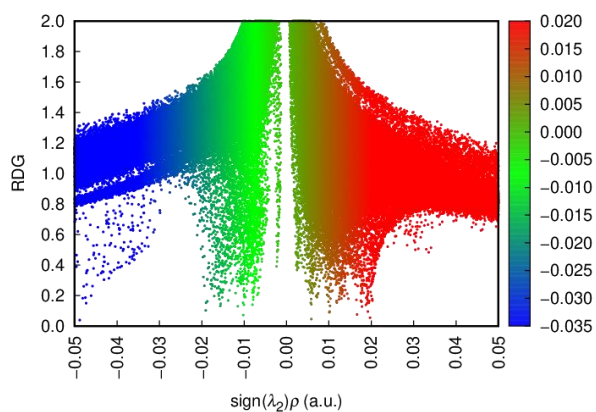

**(w) 38 ROT**

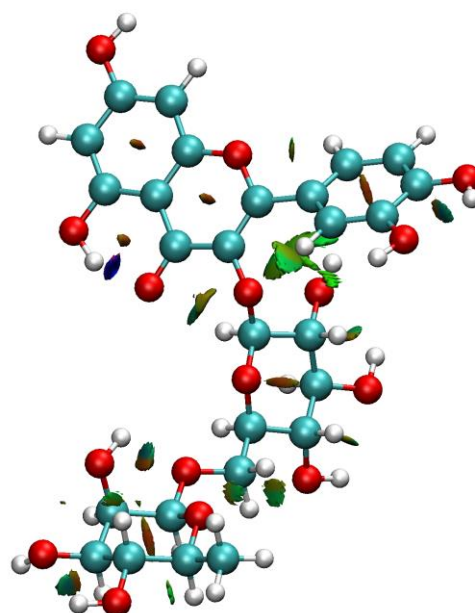

**(x) 38 ROT**

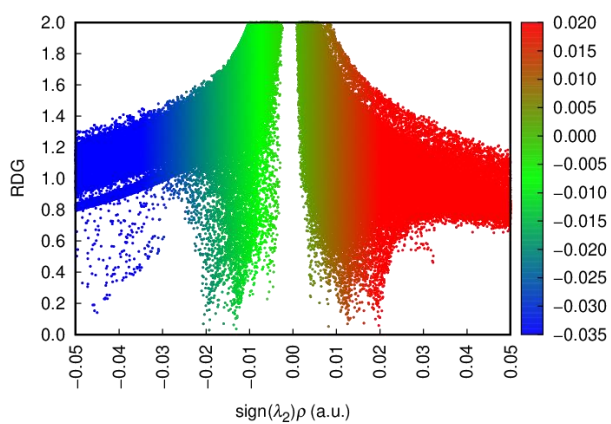

**(y) 42 OPT**

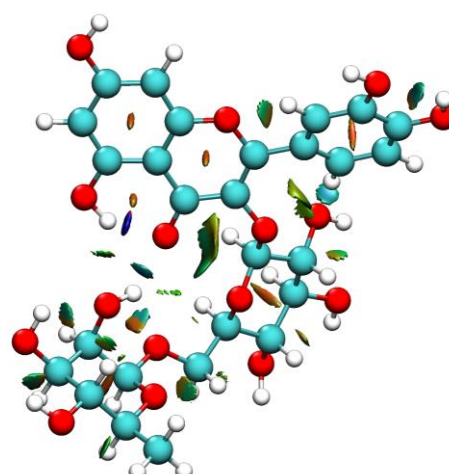

**(z) 42 OPT**



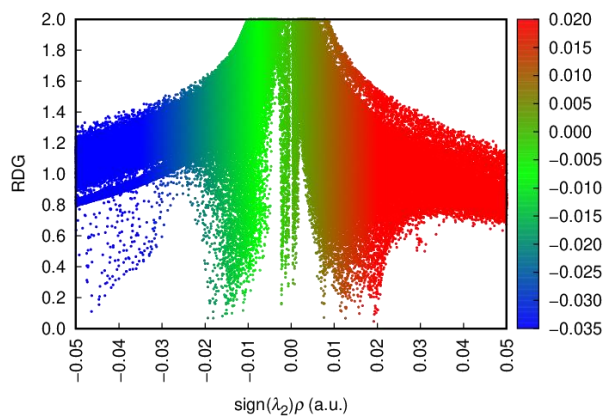

(aa) 42 ROT

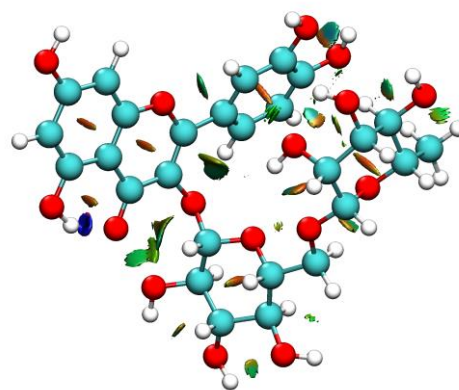

(ab) 42 ROT

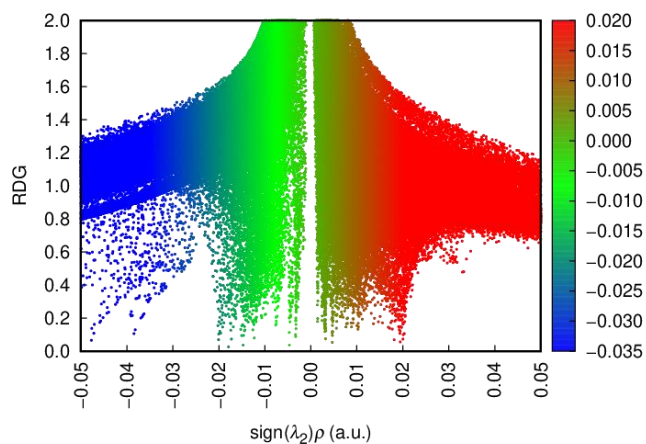

(ac) 44 FO

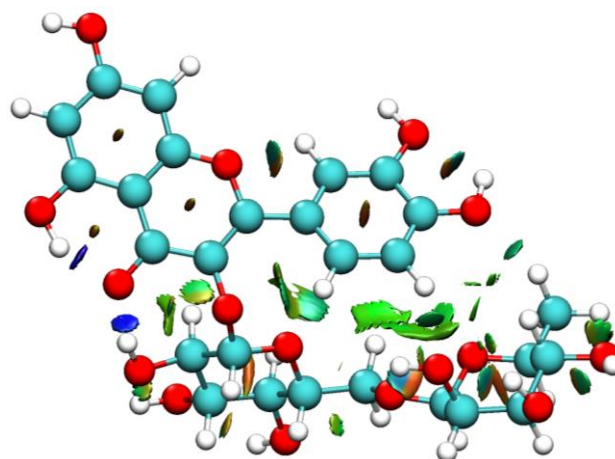

(ad) 44 FO

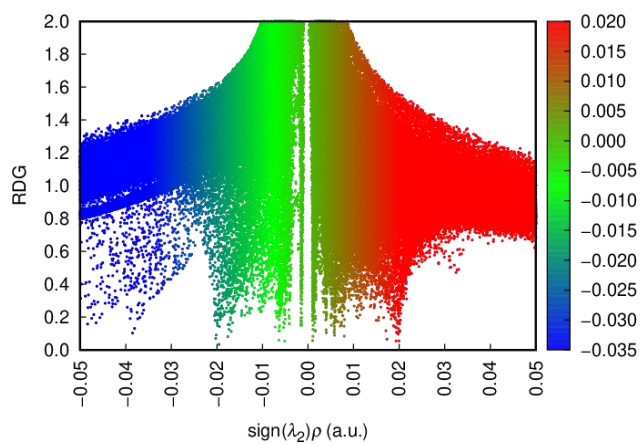

(ae) 44 ROT

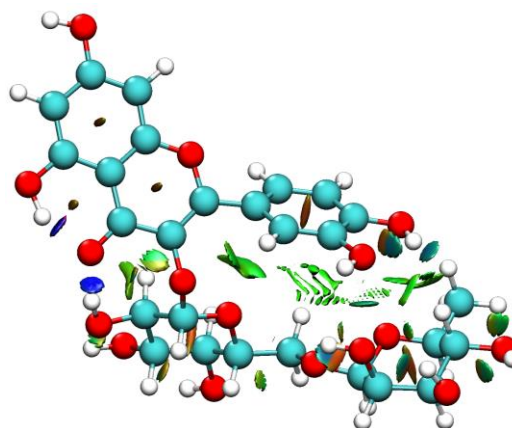

(af) 44 ROT

**Figure S5.** Bi and tridimensional NCI plots calculated at  $\omega$ B97x-D/6-31G(d,p) – PCM DMSO level of theory (FO = Fully Optimized and ROT = rotated).

**Table S2.** Selected  $\omega$ B97x-D /6-31G(d,p)-PCM-DMSO optimized torsion angles ( $^{\circ}$ ) for fully optimized structures located on the PES for rutin using relevant MD frames as input and MD original frames (#300, #400, #800 and #1000) not optimized structures. Relative energy values ( $\Delta E_{rel}$  in kcal mol $^{-1}$ ) for DFT-PCM optimized geometries and original MD frames inputs (DFT-PCM single point calculations) are also given.

| Structures                                               | $\Phi_1$<br>[O-C2-C1'-C2'] | $\Phi_2$<br>[C1''-O-C3-C2] | $\Phi_3$<br>[C2''-C1''-O-C3] | $\Phi_4$<br>[O-C6''-C5''-O] | $\Phi_5$<br>[C1'''-O-C6'''-C5'''] | $\Phi_6$<br>[C1''''-O-C6''''-C5'''] | $\Delta E_{rel}$                                |
|----------------------------------------------------------|----------------------------|----------------------------|------------------------------|-----------------------------|-----------------------------------|-------------------------------------|-------------------------------------------------|
| <b>37 PCM-DMSO-FULL-OPT (DM-#300)</b> <sup>a</sup>       | 158.3                      | -92.5                      | 14.3                         | 57.9                        | -166.2                            | 168.1                               | <b>2.2</b>                                      |
| <b>37 DM-#300 Original Frame (non-opt)</b> <sup>b</sup>  | <b>106.0</b>               | <b>-110.0</b>              | <b>57.7</b>                  | <b>39.5</b>                 | <b>-167.6</b>                     | <b>174.1</b>                        | <b>-13.4</b> <sup>c</sup><br>(197) <sup>d</sup> |
| <b>38 PCM-DMSO-FULL-OPT (DM-#400)</b> <sup>a</sup>       | 153.2                      | -113.8                     | 93.0                         | 69.4                        | 170.8                             | -175.2                              | <b>8.9</b>                                      |
| <b>38 DM-#400 Original Frame (non-opt)</b> <sup>b</sup>  | <b>114.4</b>               | <b>-117.6</b>              | <b>70.8</b>                  | <b>102.3</b>                | <b>-165.0</b>                     | <b>167.4</b>                        | <b>8.6</b> <sup>c</sup><br>(194) <sup>d</sup>   |
| <b>42 PCM-DMSO-FULL-OPT (DM-#800)</b> <sup>a</sup>       | 29.3                       | -141.2                     | 134.3                        | 67.5                        | -169.8                            | 175.3                               | <b>5.3</b>                                      |
| <b>42 DM-#800 Original Frame (non-opt)</b> <sup>b</sup>  | <b>72.6</b>                | <b>-141.3</b>              | <b>77.7</b>                  | <b>84.9</b>                 | <b>-157.7</b>                     | <b>174.8</b>                        | <b>-8.7</b> <sup>c</sup><br>(133) <sup>d</sup>  |
| <b>44 PCM-DMSO-FULL-OPT (DM (#1000))</b> <sup>a</sup>    | -20.9                      | -92.0                      | -37.7                        | 68.8                        | 165.6                             | -179.8                              | <b>0.0</b>                                      |
| <b>44 DM-#1000 Original Frame (non-opt)</b> <sup>b</sup> | <b>34.8</b>                | <b>-141.9</b>              | <b>65.3</b>                  | <b>72.9</b>                 | <b>-170.1</b>                     | <b>178.3</b>                        | <b>0.0</b> <sup>c</sup><br>(0.0) <sup>d</sup>   |

<sup>a</sup>  $\omega$ B97x-D /6-31G(d,p)-PCM-DMSO optimized torsion angles ( $^{\circ}$ ); <sup>b</sup> DM original frame (non-optimized) torsion angle.

<sup>c</sup>  $\omega$ B97x-D /6-31G(d,p)-PCM-DMSO relative energy single-point using DM original frame (non-optimized) structure

<sup>d</sup> Classical DM relative energy (using Force Field) using DM original frame (non-optimized) structure

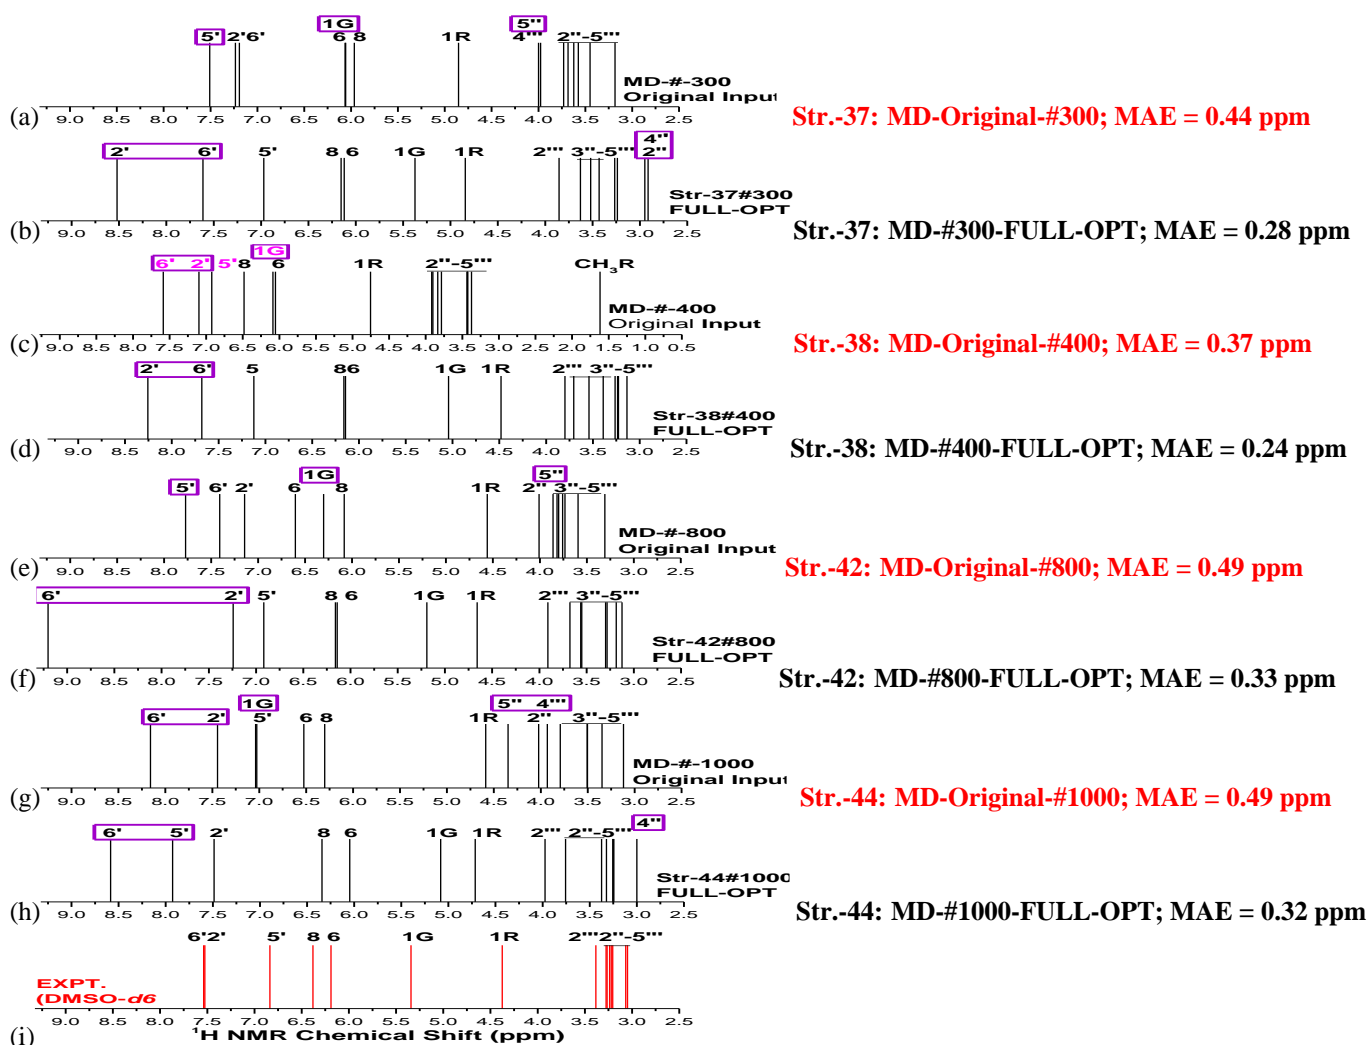

**Figure S6.** B3LYP/6-31G(d,p)-PCM-DMSO  $^1\text{H}$  NMR spectra for selected structures **37**, **42** and **44** of rutin obtained from DM frames. Three distinct structures were used in the DFT-PCM NMR calculations: (i) **Original DM frames (not optimized)** (a,c,e,g) (ii) DFT-PCM-DMSO fully optimized DM inputs (b,d,f,h) and (iii)  $\phi_1$ ,  $\phi_s$  torsion angles rotated structures (c,f,i). The experimental  $^1\text{H}$  NMR spectrum (in DMSO-*d*6) is also shown (i).

The protons having large deviation from experimental data are highlighted in pink rectangle.
